# Supplementary material
Source: PubMed Central journal article supplement (PMC4297268)
Supplement: NIHMS612187-supplement-1.pdf [file NIHMS612187-supplement-1.pdf]

# Supplemental Figure 1

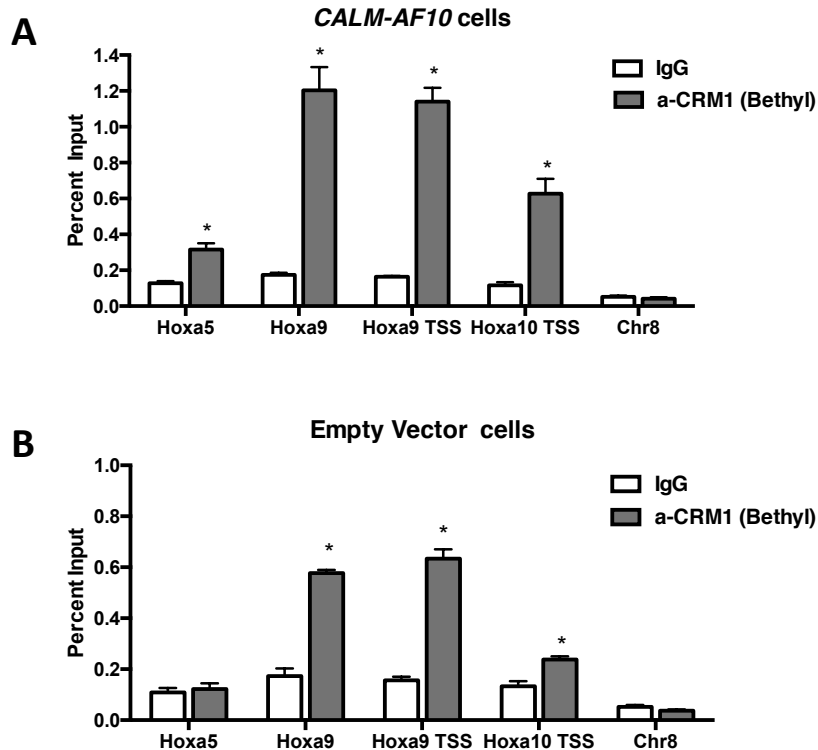

**Supplemental Figure 1: Detection of enrichment of CRM1 at *Hoxa* loci in MEFs using a separate anti-CRM1 antibody. (A-B)** ChIP analyses were performed using an anti-CRM1 antibody (Bethyl, results shown in Figure 5 were obtained using a Santa Cruz anti-CRM1 antibody) in MEFs expressing CALM-AF10 (**A**) or empty vector (**B**). *Hoxa* amplification was measured by qRT-PCR and shown as a percent of input. A region of heterochromatin (*Chr8*) was used as a negative control. Results represent mean  $\pm$  SEM from at least 3 experiments. Statistical analysis was performed by Student's t-test; \* $P < 0.05$ .
