# Supplementary material
Source: PubMed Central journal article supplement (PMC4297268)
Supplement: NIHMS612187-supplement-2.pdf [file NIHMS612187-supplement-2.pdf]

**Supplemental Table 1: Primers used for qRT-PCR**

| <b>Amplicon</b> | <b>Forward Primer (5'-3')</b> | <b>Reverse Primer (5'-3')</b> |
|-----------------|-------------------------------|-------------------------------|
| <i>mHoxa7</i>   | CACATGGTTCCAGTTTGTGG          | CTGAACCCCAGATCCACTGT          |
| <i>mHoxa9</i>   | CCCCGACTTCAGTCCTTGC           | GATGCACGTAGGGGTGGTG           |
| <i>mHoxa10</i>  | GGAAGCATGGACATTCAGGT          | CCAGGCAAGCAAGACCTTAG          |
| <i>mHoxa11</i>  | CCCCTGGTGGTTCACTCTTA          | CTTGGGGCACACAGTTTCTT          |
| <i>mGapdh</i>   | CCTGGAGAAACCTGCCAAGTATG       | AGAGTGGGAGTTGCTGTTGAAGTC      |
| <i>mβ2M</i>     | ACCGGCCTGTATGCTATCCAGAAA      | GGTGAATTCAGTGTGAGCCAGGAT      |
| <i>hHOXA9</i>   | CTGTCCCACGCTTGACACTC          | CTCCGCCGCTCTCATTCTC           |
| <i>hHOXA10</i>  | GCCCCTCCGAGAGCAGCAAAG         | AGGTGGACGCTGCGGCTAATCTCTA     |
| <i>hGAPDH</i>   | ATGGGGAAGGTGAAGGTCG           | GGGGTCATTGATGGCAACAATA        |
| <i>hβ2M</i>     | GTGTCTGGGTTTCATCCATC          | GGCAGGCATACTCATCTTTT          |
