# Supplementary material
Source: PubMed Central journal article supplement (PMC4297268)

## Supplemental Table 2: Primers used for ChIP PCR

| Amplicon                             | Forward Primer (5'-3')  | Reverse Primer (5'-3')     | Primer #<br>(diagram below) |
|--------------------------------------|-------------------------|----------------------------|-----------------------------|
| <i>mHoxa5</i>                        | CTCATTGCGGTGCGCTATCC    | AGATCCATGCCATTGTAGCC       | 1                           |
| <i>mHoxa5</i> TSS                    | CTCCACCCAACCTCCCCCATT   | GGACATGTACTCGGTTCCCT       | 3                           |
| <i>mHoxa7</i> TSS                    | TTGCTAAGCACAGCCTCGTT    | CGACCTATCATTGCAGGGGG       | 4                           |
| <i>mHoxa9</i>                        | CCCCGACTTCAGTCCTTGC     | GATGCACGTAGGGGTGGTG        | 5                           |
| <i>mHoxa9</i> TSS                    | ATCTGTATGCCTAGTCCCGCTCC | TTGATGTTGACTGGCGATTTTC     | 6                           |
| <i>mHoxa10</i> TSS                   | GGCTAGACTCACTCTGGCAA    | GCAGGGAAGCTCGGTTTAGG       | 7                           |
| ( <i>m&amp;h</i> ) <i>Hoxa11</i> TSS | GGAAGCAACAGATCGTCACTCG  | TGAGTTACACCGGCGATTACG      | 8                           |
| <i>mChr8</i>                         | AAGGGGCCTCTGCTTAAAAA    | AGAGCTCCATGGCAGGTAGA       | N/A                         |
| <i>hHOXA5</i>                        | CTCATTGCGGTGCGCTATCC    | AGATCCATGCCATTGTAGCC       | 2                           |
| <i>hHOXA7</i> TSS                    | AGAGAGATTGCCACCGCAAA    | TCACTGCTTCCCTTAGGGCG       | 4                           |
| <i>hHOXA9</i>                        | CTGTCCCACGCTTGACACTC    | CTCCGCCGCTCTCATTCTC        | 5                           |
| <i>hHOXA9</i> TSS                    | TCGCATTGTGCTCTACTGT     | TTGGTCGTTTCCGACTTCCC       | 6                           |
| <i>hHOXA10</i> TSS                   | TCCCCGGTGTACTCTAACCA    | TGAGGATCCTGACGGCCATA       | 7                           |
| <i>hChr12</i>                        | GAGCAAGGAATGTTTGTGCCA   | GGGCATTAATAATTCAGAGTAGCAGT | N/A                         |

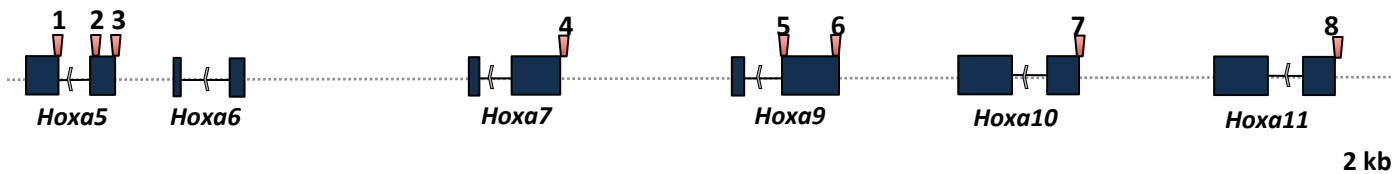

Supplement: NIHMS612187-supplement-3.pdf [file NIHMS612187-supplement-3.pdf]
